# Supplementary material for: Can metal-free silicon-doped hexagonal boron nitride nanosheets and nanotubes exhibit activity toward CO oxidation?
Source: Royal Society of Chemistry journal article supplement (doi:10.1039/c4cp05007j), 2014-11-03

*Supporting Information for*

**Can Metal-Free Silicon-Doped Hexagonal Boron Nitride Nanosheet and  
Nanotube Exhibit Activity toward CO Oxidation?**

*Sen Lin\*, Xinxin Ye, Jing Huang*

*Research Institute of Photocatalysis, State Key Laboratory of Photocatalysis on  
Energy and Environment, Fuzhou University, Fuzhou 350002, China*

---

\*Corresponding author. [Address](#): Research Institute of Photocatalysis, Fuzhou University, Fuzhou 350002, China.  
[Phone](#): +86-591-83969175. [Email](#): [slin@fzu.edu.cn](mailto:slin@fzu.edu.cn).

**Figure S-1.** Side and top views for the configurations of initial state (IS), transition state (TS), intermediate state (INT) and final state (FS) with the calculated energies (eV) during CO oxidation following Langmuir–Hinshelwood mechanism on two Si atoms doped h-BNNS.

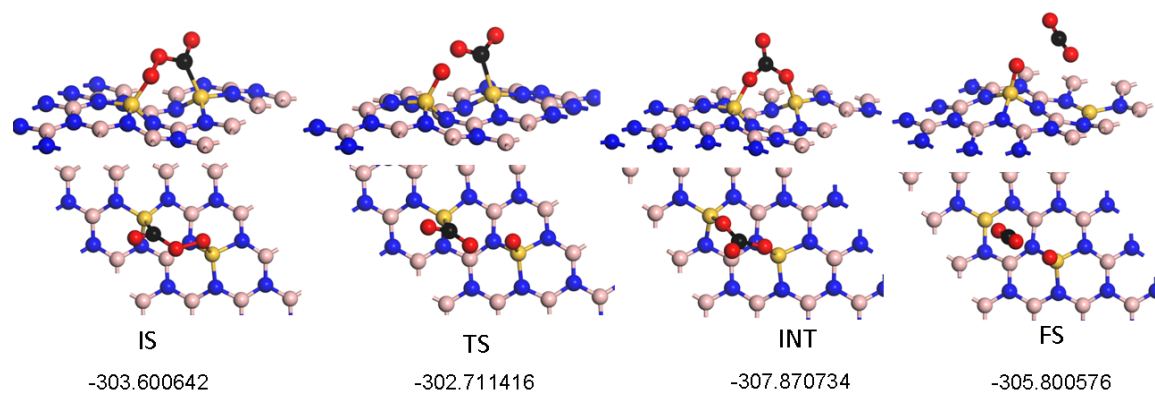

Supplement: c4cp05007j1.pdf [file c4cp05007j1.pdf]
